# Supplementary material
Source: publisher site journal article supplement (https://www.dovepress.com/get_supplementary_file.php?f=398489.docx)
Supplement: Supplementary file 1 [file get_supplementary_file.php]

**SUPPLEMANTARY FILES**

**Supplementary Tables**

**Supplementary Table 1** Measurement invariance across the sexes, for having clinical insomnia, and for distinguishing poor vs good sleepers

| Model | χ2 | df | Δ χ2 | Δdf | p | CFI | ΔCFI | RMSEA | ΔRMSEA |
| --- | --- | --- | --- | --- | --- | --- | --- | --- | --- |
| Sex | | | | | | | | | |
| Configural | 182.946 | 54 |  |  |  | 0.966 |  | 0.079 |  |
| Metric | 209.300 | 62 | 26.354 | 8 | <0.001 | 0.961 | 0.005 | 0.078 | -0.001 |
| Scalar | 242.496 | 70 | 33.196 | 8 | <0.001 | 0.955 | 0.006 | 0.080 | 0.002 |
| Clinical insomnia | | | | | | | | | |
| Configural | 189.335 | 54 |  |  |  | 0.962 |  | 0.081 |  |
| Metric | 195.581 | 62 | 6.246 | 8 | 0.620 | 0.962 | .000 | 0.075 | -0.006 |
| Scalar | 205.285 | 70 | 9.704 | 8 | 0.286 | 0.962 | .000 | 0.071 | -0.004 |
| Poor sleep quality | | | | | | | | | |
| Configural | 180.716 | 54 |  |  |  | 0.967 |  | 0.078 |  |
| Metric | 193.091 | 62 | 12.375 | 8 | 0.135 | 0.965 | 0.002 | 0.074 | -0.004 |
| Scalar | 198.049 | 70 | 4.958 | 8 | 0.762 | 0.966 | -0.001 | 0.069 | -0.005 |

**Abbreviations:** CFI, comparative fit index; RMSEA, root mean square error of approximation.

**Supplementary Table 2** Item fits of the FIRST-T

| **Items** | **S-χ2** | **Df** | **p-value** | **RMSEA** |
| --- | --- | --- | --- | --- |
| **Item 1** | 65.508 | 41 | 0.020 | 0.028 |
| **Item 2** | 39.991 | 36 | 0.387 | 0.012 |
| **Item 3** | 64.124 | 332 | 0.009 | 0.036 |
| **Item 4** | 64.055 | 35 | 0.009 | 0.033 |
| **Item 5** | 55.736 | 51 | 0.387 | 0.011 |
| **Item 6** | 38.247 | 38 | 0.429 | 0.003 |
| **Item 7** | 36.506 | 37 | 0.429 | 0.000 |
| **Item 8** | 65.892 | 48 | 0.079 | 0.022 |
| **Item 9** | 84.029 | 52 | 0.009 | 0.028 |
| **Notes:** p-values adjusted for false discovery rate (FDR)  **Abbreviations:** RMSEA: Root-mean-square-error of approximation. | | | | |

**Supplementary Table 3** Differential item functioning information of the FIRST-T across the sexes, for having clinical insomnia, and for poor sleep quality

|  | | | | | | | | |
| --- | --- | --- | --- | --- | --- | --- | --- | --- |
| **Items** | **AIC** | **AICc** | **SABIC** | **HQ** | **BIC** | **χ2** | **df** | **p-value** |
| **Males vs females** | | | | | | | | |
| **Item 1** | .863 | 1.295 | 2.339 | 2.653 | 5.515 | 1.137 | 1 | 0.643 |
| **Item 2** | 1.999 | 2.430 | 3.475 | 3.788 | 6.650 | 0.001 | 1 | 0.970 |
| **Item 3** | 1.150 | 1.582 | 2.626 | 2.940 | 5.802 | 0.850 | 1 | 0.643 |
| **Item 4** | -0.961 | -0.529 | 0.515 | 0.829 | 3.690 | 2.961 | 1 | 0.600 |
| **Item 5** | 0.358 | 0.790 | 1.834 | 2.148 | 5.010 | 1.642 | 1 | 0.600 |
| **Item 6** | 1.961 | 2.392 | 3.437 | 3.750 | 6.612 | 0.039 | 1 | 0.970 |
| **Item 7** | 0.218 | 0.650 | 1.694 | 2.008 | 4.870 | 1.782 | 1 | 0.600 |
| **Item 8** | 1.972 | 2.404 | 3.448 | 3.762 | 6.624 | 0.028 | 1 | 0.970 |
| **Item 9** | 1.971 | 2.403 | 3.447 | 3.61 | 6.623 | 0.029 | 1 | 0.970 |
|  | | | | | | | | |
| **Item 1** | 1.910 | 2.333 | 3.377 | 3.691 | 6.553 | 0.099 | 1 | 0.753 |
| **Item 2** | 1.634 | 2.066 | 3.110 | 3.424 | 6.286 | 0.366 | 1 | 0.753 |
| **Item 3** | 1.833 | 2.264 | 3.309 | 3.622 | 6.484 | 0.167 | 1 | 0.753 |
| **Item 4** | -4.550 | -4.118 | -3.074 | -2.760 | 0.102 | 6.550 | 1 | 0.090 |
| **Item 5** | 1.481 | 1.912 | 2.957 | 3.270 | 6.132 | 0.519 | 1 | 0.753 |
| **Item 6** | 0.999 | 1.431 | 2.475 | 2.789 | 5.651 | 1.001 | 1 | 0.753 |
| **Item 7** | 1.838 | 2.269 | 3.314 | 3.628 | 6.489 | 0.162 | 1 | 0.753 |
| **Item 8** | 1.712 | 2.144 | 3.188 | 3.502 | 6.364 | 0.288 | 1 | 0.753 |
| **Item 9** | 1.385 | 1.817 | 2.862 | 3.175 | 6.037 | 0.615 | 1 | 0.753 |
| Poor sleeper | | | | | | | | |
| **Item 1** | 1.408 | 1.839 | 2.884 | 3.198 | 6.059 | 0.592 | 1 | 0.701 |
| **Item 2** | 0.834 | 1.265 | 2.310 | 2.623 | 5.485 | 1.166 | 1 | 0.630 |
| **Item 3** | -2.246 | -1.814 | -0.769 | -0.456 | 2.406 | 4.246 | 1 | 0.351 |
| **Item 4** | 1.471 | 1.903 | 2.948 | 3.261 | 6.123 | 0.529 | 1 | 0.701 |
| **Item 5** | 1.635 | 2.066 | 3.111 | 3.424 | 6.286 | 0.365 | 1 | 0.702 |
| **Item 6** | 0.779 | 1.211 | 2.255 | 2.569 | 5.431 | 1.221 | 1 | 0.630 |
| **Item 7** | 0.615 | 1.047 | 2.091 | 2.405 | 5.267 | 1.385 | 1 | 0.630 |
| **Item 8** | 2.000 | 2.431 | 3.476 | 3.789 | 6.651 | 0.000 | 1 | 0.985 |
| **Item 9** | 1.819 | 2.251 | 3.295 | 3.609 | 6.471 | 0.181 | 1 | 0.755 |
| **Notes:** p-values adjusted for false discovery rate (FDR)  **Abbreviations:** AIC = Akaike Information Criterion, AICc = Akaike Information Criterion corrected, SABIC = Sample-size adjusted Bayesian Information Criterion, HQ = Hannan–Quinn Criterion, BIC = Bayesian Information Criterion | | | | | | | | |

**Supplementary Figures**


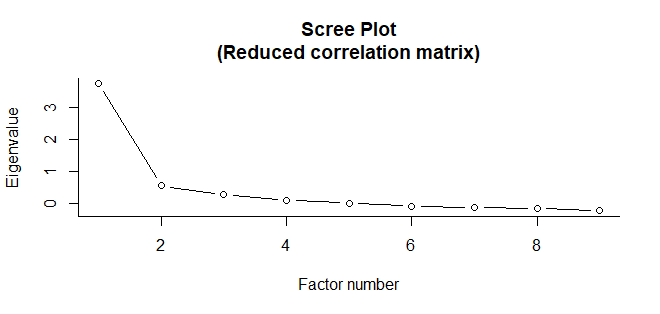


**Supplementary Figure 1:** Scree plot of the FIRST-T with reduced correlation matrix. In this scree plot, only single factor has the eigenvalue more than 1. This suggest the single factor structure of the FIRST-T.


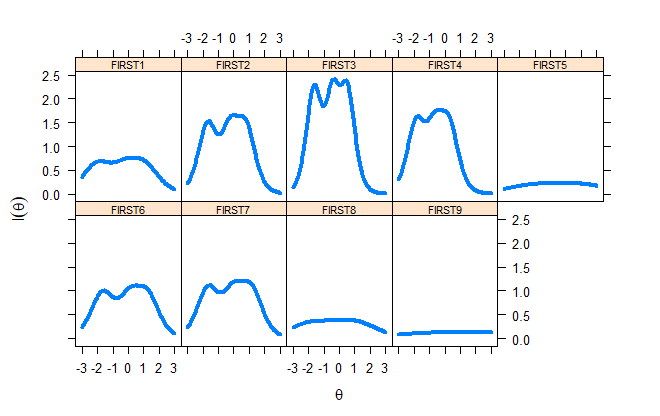


**Supplementary Figure 2:** Item information curves of the FIRST-T. Item 1-4 and Item 6-7 provide sufficient information about the participants’ insomnia stress response. Item 5 and Item 8-9 provide less information.


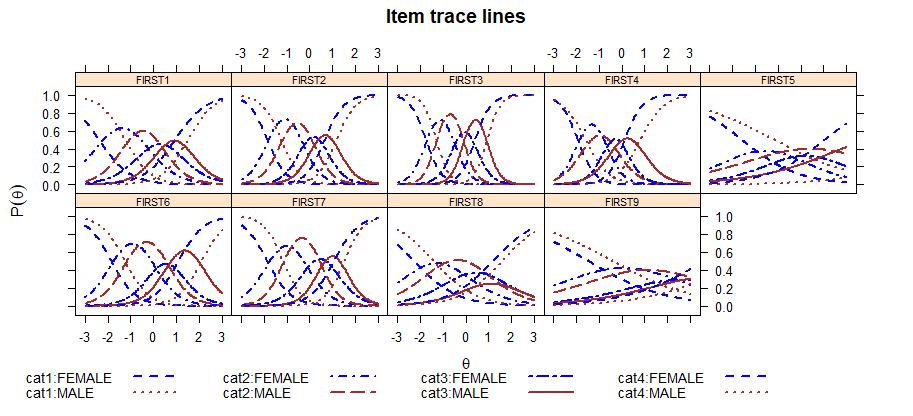


**Supplementary Figure 3:** Differential item functioning (DIF) bias information of the FIRST-T across sex. The blue curves (for female) are not much deviated from the red curves (for male) across the items. These figures indicate the absence of DIF bias across sex.


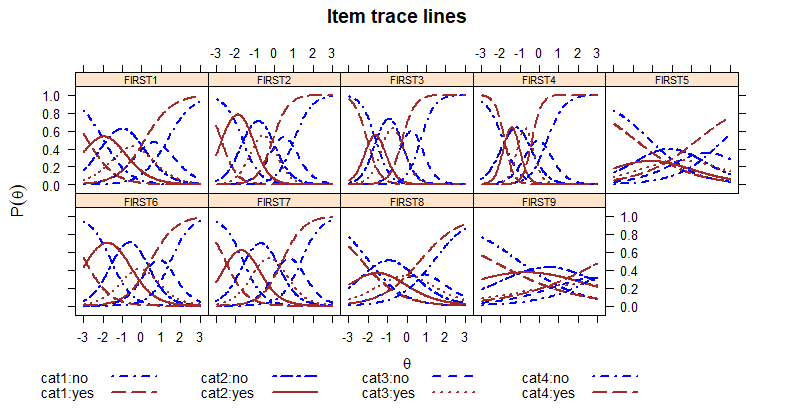


**Supplementary Figure 4:** Differential item functioning bias information of the FIRST-T for distinguishing those with and without clinical insomnia. The blue curves (for no insomnia symptoms) are not much deviated from the red curves (for having insomnia symptoms) across the items. These figures indicate the absence of DIF bias across having insomnia and not having insomnia.


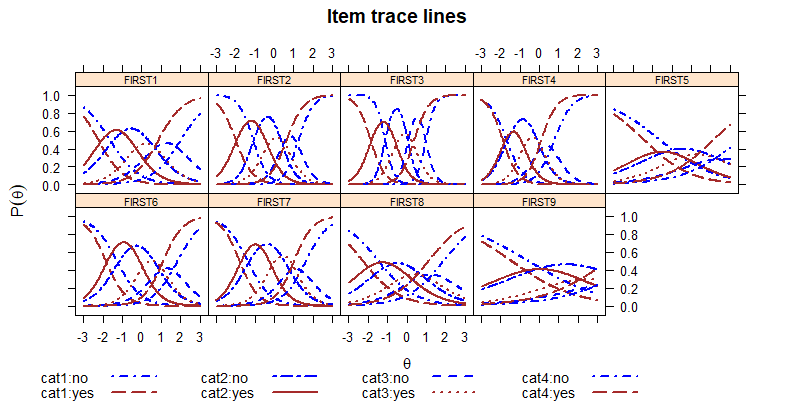


**Supplementary Figure 5:** Differential item functioning bias information of the FIRST-T for distinguishing those with and without poor sleep. The blue curves (for good sleepers) are not much deviated from the red curves (for poor sleepers) across the items. These figures indicate the absence of DIF bias between good sleepers and poor sleepers.


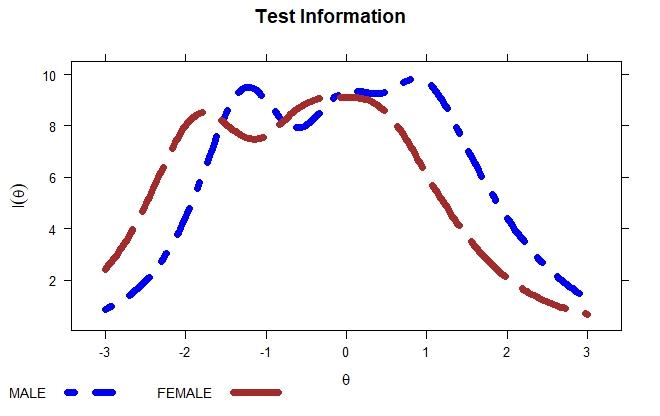


**Supplementary Figure 6:** Differential item functioning bias information of scale information curve of the FIRST-T between male and female. These curves shows that this scale is provides more information about the latent construct of both males and females between -2.00 θ level to 1.75 θ level (approximately). Both curves are not much deviated from each that indicate the absence of DIF bias.


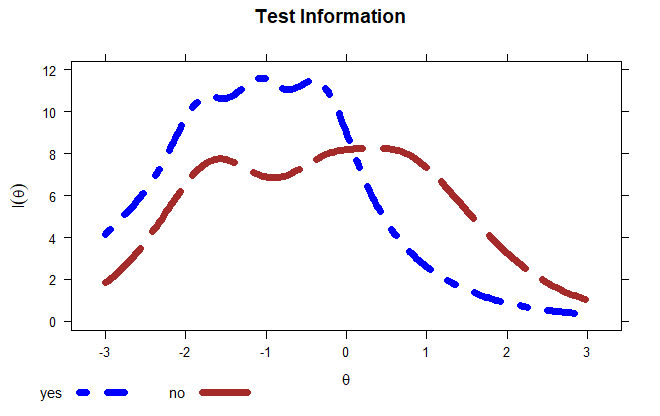


**Supplementary Figure 7:** Differential item functioning bias information of scale information curve of the FIRST-T between those with and those without clinical insomnia. This scale provides more information about the latent construct for people having insomnia symptoms (between -2.00 θ level to 0.0 θ level) [blue curve]. About the people without insomnia symptoms, this scale provides more information about the latent construct between -2.00 θ level to 1.25 θ level [red curve], but less information than for people having insomnia symptoms. These curves are much deviated between -2.00 θ level and 0.0 θ level. Based on item level DIF information, this deviation would not be statistically significant.


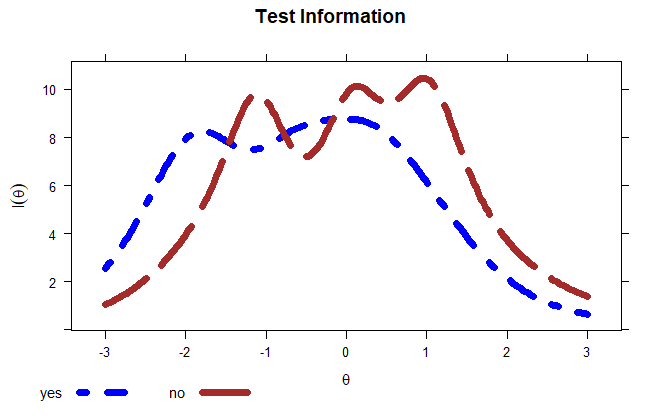


**Supplementary Figure 8:** Differential item functioning bias information of scale information curve of the FIRST-T between those with poor sleep quality and those with good sleep quality. This scale provides more information about the latent construct for good sleepers between -2.25 θ level to 0.75 θ level) [blue curve]. About the poor sleepers, this scale provides more information about the latent construct between -1.50 θ level to 1.40 θ level [red curve]. Both curves are not much deviated from each that indicate the absence of DIF bias.
